# Supplementary material
Source: PubMed Central journal article supplement (PMC3873715)
Supplement: NIHMS516863-supplement-supplement_1.pdf [file NIHMS516863-supplement-supplement_1.pdf]

**SUPPLEMENTAL MATERIAL**

**Supplementary Table I. Baseline Characteristics of Stroke/TIA Study Samples based on BDNF quartiles**

| <u><i>Clinical Characteristics</i></u> | <b>Entire<br/>Sample<br/>N=3440</b> | <b>Q1 BDNF<br/>N=847</b> | <b>Q2-Q3-Q4 BDNF<br/>N=2593</b> | <b>p</b>         |
|----------------------------------------|-------------------------------------|--------------------------|---------------------------------|------------------|
| Women,%                                | 56%                                 | 50%                      | 59%                             | <b>&lt;0.001</b> |
| Age, years*                            | 65±11                               | 66±11                    | 64±11                           | <b>&lt;0.001</b> |
| Systolic Blood Pressure, mmHg*         | 130±20                              | 130±21                   | 129±20                          | 0.214            |
| Anti-hypertensive medication, %        | 36%                                 | 37%                      | 36%                             | 0.506            |
| Current smokers, %                     | 11%                                 | 9%                       | 12%                             | <b>0.015</b>     |
| Diabetes mellitus, %                   | 12%                                 | 14%                      | 12%                             | 0.070            |
| Prevalent cardiovascular disease, %    | 14%                                 | 16%                      | 13%                             | 0.066            |
| Atrial fibrillation, %                 | 3.8%                                | 5.8%                     | 3.2%                            | <b>&lt;0.001</b> |

\* mean±SD.

**Supplementary Table II. Baseline Characteristics of NP Study Samples based on BDNF quartiles**

| <u><i>Clinical Characteristics</i></u> | <b>Entire Sample<br/>N=2104</b> | <b>Q1 BDNF<br/>N=498</b> | <b>Q2-Q3-Q4<br/>BDNF<br/>N=1606</b> | <b>p</b>         |
|----------------------------------------|---------------------------------|--------------------------|-------------------------------------|------------------|
| Women, %                               | 55%                             | 48%                      | 57%                                 | <b>&lt;0.001</b> |
| Age, years*                            | 61±9                            | 62±10                    | 61±9                                | <b>&lt;0.001</b> |
| Systolic Blood Pressure, mm Hg*        | 126±19                          | 127±19                   | 126±18                              | 0.161            |
| Anti-hypertensive medication, %        | 31%                             | 32%                      | 30%                                 | 0.354            |
| Current smokers, %                     | 11%                             | 9%                       | 12%                                 | 0.067            |
| Diabetes mellitus, %                   | 11%                             | 15%                      | 10%                                 | <b>0.007</b>     |
| Prevalent cardiovascular disease, %    | 10%                             | 12%                      | 9%                                  | 0.077            |
| Atrial fibrillation, %                 | 3%                              | 3%                       | 2%                                  | 0.233            |
| Total cholesterol, mg/dl               | 201±37                          | 195±36                   | 203±37                              | <b>&lt;0.001</b> |
| **Total homocysteine, µmol/L**         | 7.8 [6.5,9.5]                   | 7.7 [6.3,9.7]            | 7.8 [6.6,9.5]                       | 0.584            |
| College Degree                         | 39%                             | 42%                      | 38%                                 | 0.095            |
| Depression (CES-D score)**             | 3 [1,7]                         | 3 [1,7]                  | 3 [1,7]                             | 0.805            |
| Physical activity index (PAI) **       | 37 [33,41]                      | 36 [34,41]               | 37 [33,41]                          | 0.920            |
| <u><i>Brain MRI Measures</i></u>       |                                 |                          |                                     |                  |
| WMHI (Log)                             | -3.0 ± 1.0                      | -2.9 ± 1.1               | -3.1 ± 1.0                          | <b>0.001</b>     |
| Extensive WMH                          | 12%                             | 14%                      | 11%                                 | 0.142            |
| <u><i>Cognitive Measures</i></u>       |                                 |                          |                                     |                  |
| VRd                                    | 8.1±3.4                         | 7.7±3.4                  | 8.3±3.3                             | <b>0.002</b>     |
| TrB-TrA**                              | 0.67 [0.45,0.98]                | 0.72 [0.48,1.07]         | 0.65 [0.43,0.97]                    | <b>0.042</b>     |

\* mean±SD.

\*\* Comparison made using log-transformed measures

**Supplementary Table III. Baseline Characteristics of MRI Study Samples based on BDNF quartiles**

| <u>Clinical Characteristics</u>     | Entire Sample<br>N=1863 | Q1 BDNF<br>N=440 | Q2-Q3-Q4<br>BDNF<br>N=1423 | p                |
|-------------------------------------|-------------------------|------------------|----------------------------|------------------|
| Women,%                             | 55%                     | 48%              | 57%                        | <b>0.002</b>     |
| Age, years*                         | 61±9                    | 62±10            | 61±9                       | <b>0.001</b>     |
| Systolic Blood Pressure, mm Hg*     | 126±19                  | 127±19           | 125±18                     | 0.069            |
| Anti-hypertensive medication, %     | 30%                     | 30%              | 30%                        | 0.908            |
| Current smokers, %                  | 11%                     | 8%               | 12%                        | <b>0.039</b>     |
| Diabetes mellitus, %                | 12%                     | 14%              | 11%                        | <b>0.037</b>     |
| Prevalent cardiovascular disease, % | 9%                      | 11%              | 9%                         | 0.095            |
| Atrial fibrillation, %              | 2%                      | 3%               | 2%                         | 0.120            |
| Total cholesterol, mg/dl            | 201±37                  | 195±36           | 203±37                     | <b>&lt;0.001</b> |
| **Total homocysteine, µmol/L**      | 7.8 [6.5,9.5]           | 7.7 [6.3,9.7]    | 7.8 [6.6,9.5]              | 0.621            |
| College Degree                      | 39%                     | 42%              | 39%                        | 0.210            |
| Depression (CES-D score)**          | 3 [1,7]                 | 3 [1,7]          | 3 [1,7]                    | 0.951            |
| Physical activity index (PAI) **    | 37 [33,41]              | 37 [34,41]       | 37 [33,41]                 | 0.794            |
| <u>Brain MRI Measures</u>           |                         |                  |                            |                  |
| WMHI (Log)                          | -3.0 ± 1.0              | -2.9 ± 1.1       | -3.1 ± 1.0                 | <b>0.001</b>     |
| Extensive WMH                       | 12%                     | 14%              | 11%                        | 0.142            |
| <u>Cognitive Measures</u>           |                         |                  |                            |                  |
| VRd                                 | 8.2±3.3                 | 7.8±3.4          | 8.4±3.3                    | <b>0.002</b>     |
| TrB-TrA**                           | 0.67 [0.45-0.98]        | 0.73 [0.50-1.08] | 0.65 [0.43-0.95]           | <b>0.015</b>     |

\*mean±SD.

\*\* Comparison made using log-transformed measures

**Supplementary Table IV. Association of serum BDNF and logVEGF and risk of stroke/ only**

| Case/N  |           |         | All Stroke (151/3513)*  |              |
|---------|-----------|---------|-------------------------|--------------|
|         |           |         | HR [95% CI]             | P            |
| BDNF    | Per SD    | Model A | 0.91[0.77-1.08]         | 0.28         |
|         |           | Model B | 0.93[0.78-1.10]         | 0.38         |
|         | Q1        | Model A | 1.00                    | REF          |
|         | Q2        |         | 0.96 [0.64-1.45]        | 0.86         |
|         | Q3        |         | <b>0.58 [0.36-0.94]</b> | <b>0.028</b> |
|         | Q4        |         | 0.82 [0.53-1.31]        | 0.43         |
|         | Q1vsQ2-Q4 | Model A | 1.26 [0.89-1.78]        | 0.20         |
|         |           | Model B | 1.23[0.87-1.75]         | 0.24         |
| logVEGF | Per SD    | Model A | <b>1.22[1.03-1.43]</b>  | <b>0.019</b> |
|         |           | Model B | <b>1.23[1.05-1.46]</b>  | <b>0.013</b> |

Model A: adjusted for age and sex

Model B: adjusted for systolic blood pressure, prevalent CVD, diabetes mellitus, atrial fibrillation, current smoking

\*Study Sample 1b; over a 10-year follow-up period we observed 151 incident strokes

(129 ischemic, 21 hemorrhagic and one definite stroke of uncertain etiology)

**Supplementary Table V. Additional effect of serum BDNF and VEGF on risk of stroke/TIA**

| †Model B                                |             | HR [95% CI]            | P            | NRI [95%CI]                | C-Statistics     |
|-----------------------------------------|-------------|------------------------|--------------|----------------------------|------------------|
| BDNF                                    | Q1 vs Q2-Q4 | <b>1.47[1.09-2.00]</b> | <b>0.012</b> | <b>0.199 [0.023-0.384]</b> | 0.79 [0.76-0.81] |
| Log(VEGF)                               | Per SD      | <b>1.21[1.04-1.40]</b> | <b>0.012</b> | <b>0.234 [0.067-0.401]</b> | 0.79 [0.76-0.82] |
| <b>Model with both markers included</b> |             |                        |              |                            |                  |
| BDNF                                    | Q1 vs Q2-Q4 | <b>1.62[1.20-2.20]</b> | <b>0.002</b> | <b>0.274 [0.090-0.449]</b> | 0.79 [0.76-0.82] |
| Log(VEGF)                               | Per SD      | <b>1.25[1.08-1.45]</b> | <b>0.003</b> |                            |                  |

†Model B: Model A additionally adjusted for SBP, CVD, DM, AF and SMK

Note: the interaction between log(VEGF) and Q1-BDNF has p=0.465.
